# Supplementary material for: Nucleation rate and Gibbs free energy of nucleation of APIs, large molecule, amino acid and inorganic materials in solution at different cooling rates
Source: Royal Society of Chemistry journal article supplement (doi:10.1039/d5ce00467e), 2025-01-01
Supplement: d5ce00467e1.xlsx [file d5ce00467e1.xlsx]

## Sheet: borax
Supplementary File Model Calculations for estimating nucleation kinetics parameters based on the literature reported.
	Compound	Borax
			Units						Avagadro Number	6.023e+23	molecules/mol
	Molecular wt.	381.37	g/mol
	Molecular Formula	Na2B4O7·10H2O
	Solvent	Water
									Δcmax	Δcmax	ΔTmax	S
					T,K	c*, g/mL	Tnuc, K	cnuc, g/mL	c*-cnuc, g/mL	c*-cnuc, mol/m3	T-Tnuc, K	c*/cnuc	R', K/sec	ΔG, kJ/mol	kn, #/m3sec		1/Tnuc, K	J, #/m3sec	γ,mJ/m2	rc, m	Vcell1/3,m	2rc/Vcell1/3	Nm/V, #/m3	tind, sec
	DOI	https://doi.org/10.1021/je201073e			289.098	0.0371837	278.3	0.022725	0.0144587	2.28347e+25	10.7984	1.63625	0.00333333	27.5102	1.02655e+27	50.3071	0.00359324	7.04294e+21	9.91777	1.04889e-09	1.16e-09	1.80843	2.28157e+25	3239.51
					292.682	0.0437843	282.02	0.0269261	0.0168581	2.66242e+25	10.6618	1.62609		4.56752e-20		50.4734	0.00354585	8.23882e+21	9.92141	1.0487e-09		1.8081	2.63522e+25	3198.54
					296.626	0.0524113	288.27	0.0358053	0.016606	2.62259e+25	8.35583	1.46379		J		50.702	0.00346897	1.06253e+22	8.55776	1.12916e-09		1.94684	2.6635e+25	2506.75
					300.022	0.0611913	292.45	0.0433239	0.0178674	2.82181e+25	7.57238	1.41241				50.8737	0.00341939	1.25197e+22	8.0914	1.16125e-09		2.00216	2.84411e+25	2271.71
					302.931	0.0698705	295.721	0.0502939	0.0195766	3.09175e+25	7.20965	1.38924				51.0142	0.00338156	1.4189e+22	7.88919	1.17604e-09		2.02765	3.06894e+25	2162.9
					289.098	0.0371837	273.931	0.0186199	0.0185638	2.93179e+25	15.1675	1.99699	0.0106667	25.889	1.76509e+27	51.3805	0.00365056	1.0018e+22	12.0617	9.22658e-10	1.16e-09	1.59079	1.42452e+25	1421.96
					292.682	0.0437843	278.976	0.0234365	0.0203478	3.21354e+25	13.7057	1.86821		4.29835e-20		51.5736	0.00358454	1.24639e+22	11.4117	9.48571e-10		1.63547	1.6015e+25	1284.91
					296.626	0.0524113	285.235	0.0311771	0.0212343	3.35354e+25	11.3912	1.68109		J		51.8012	0.00350589	1.61689e+22	10.2382	1.00146e-09		1.72666	1.72672e+25	1067.93
					300.022	0.0611913	288.936	0.0369091	0.0242822	3.8349e+25	11.0865	1.65789				51.9624	0.00346098	1.87593e+22	10.1416	1.00622e-09		1.73487	1.94977e+25	1039.36
					302.931	0.0698705	292.759	0.0439378	0.0259328	4.09558e+25	10.1726	1.59022				52.1142	0.00341578	2.17851e+22	9.66054	1.03097e-09		1.77754	2.0776e+25	953.68

## Sheet: Glycine
Supplementary File Model Calculations for estimating nucleation kinetics parameters based on the literature reported.
	Compound	Glycine
			Units						Avagadro Number	6.023e+23	molecules/mol
	Molecular wt.	75.07	g/mol
	Molecular Formula	C2H5NO2
	Solvent	Water
									Δcmax	Δcmax	ΔTmax	S
					T,K	c*, g/mL	Tnuc, K	cnuc, g/mL	c*-cnuc, g/mL	c*-cnuc, mol/m3	T-Tnuc, K	c*/cnuc	R', K/sec	ΔG, kJ/mol	kn, #/m3sec		1/Tnuc, K	J, #/m3sec	γ,mJ/m2	rc, m	Vcell1/3,m	2rc/Vcell1/3	Nm/V, #/m3	tind, sec
					302.798	0.30016	293.855	0.252555	0.0476053	3.81946e+26	8.943	1.1885	0.00166667	14.2918	2.43117e+25	52.6195	0.00340304	7.00276e+22	4.11139	1.17421e-09	6.9e-10	3.40349	3.75754e+26	5365.8
	DOI	10.1080/00986445.2011.545301			311.371	0.35018	303.315	0.300858	0.0493222	3.95721e+26	8.056	1.16394		2.37287e-20		52.7594	0.0032969	8.40438e+22	3.85349	1.21286e-09		3.51554	4.06234e+26	4833.6
					318.392	0.40022	311.519	0.350168	0.0500525	4.0158e+26	6.873	1.14294				52.9329	0.00321008	9.7572e+22	3.6024	1.25442e-09		3.636	4.02367e+26	4123.8
					324.674	0.44989	318.614	0.399282	0.0506075	4.06033e+26	6.06	1.12675				53.0698	0.00313859	1.10329e+23	3.39165	1.29281e-09		3.74727	4.01157e+26	3636
					302.798	0.30016	290.751	0.238461	0.0616995	4.95026e+26	12.047	1.25874	0.005	13.5485	5.50344e+25	53.6795	0.00343937	1.48924e+23	4.85623	1.05194e-09	6.9e-10	3.04909	3.58818e+26	2409.4
					311.371	0.35018	300.95	0.287978	0.0622017	4.99055e+26	10.421	1.21599		2.24946e-20		53.8326	0.00332281	1.81963e+23	4.4584	1.09787e-09		3.18223	3.79246e+26	2084.2
					318.392	0.40022	309.745	0.338862	0.0613581	4.92287e+26	8.647	1.18107		J		54.0056	0.00322846	2.14002e+23	4.08134	1.14746e-09		3.32598	3.70096e+26	1729.4
					324.674	0.44989	316.618	0.384807	0.0650825	5.22169e+26	8.056	1.16913				54.1353	0.00315838	2.41401e+23	3.97114	1.16328e-09		3.37182	3.88945e+26	1611.2
					302.798	0.30016	282.843	0.206006	0.0941539	7.55414e+26	19.955	1.45704	0.0166667	11.9813	1.01287e+26	54.8015	0.00353553	2.32325e+23	6.35331	8.64857e-10	6.9e-10	2.50683	2.78162e+26	1197.3
					311.371	0.35018	297.403	0.269688	0.080492	6.45802e+26	13.968	1.29846		1.98926e-20		55.0014	0.00336244	3.12835e+23	5.14899	9.60693e-10		2.78462	2.62181e+26	838.08
					318.392	0.40022	304.424	0.307094	0.0931259	7.47166e+26	13.968	1.30325		J		55.1472	0.00328489	3.57446e+23	5.2787	9.48816e-10		2.75019	2.99568e+26	838.08
					324.674	0.44989	312.923	0.359382	0.0905081	7.26162e+26	11.751	1.25184				55.2915	0.00319567	4.16693e+23	4.81708	9.9324e-10		2.87896	2.93793e+26	705.06

## Sheet: Lysozyme
Supplementary File Model Calculations for estimating nucleation kinetics parameters based on the literature reported.
	Compound	Lysozyme
			Units						Avagadro Number	6.023e+23	molecules/mol
	Molecular wt.	14600	g/mol
	Molecular Formula	C2H5NO2
	Solvent	NaCL
									Δcmax	Δcmax	ΔTmax	S
					T,K	c*, g/mL	Tnuc, K	cnuc, g/mL	c*-cnuc, g/mL	c*-cnuc, mol/m3	T-Tnuc, K	c*/cnuc	R', K/sec	ΔG, kJ/mol	kn, #/m3sec		1/Tnuc, K	J, #/m3sec	γ,mJ/m2	rc, m	Vcell1/3,m	2rc/Vcell1/3	Nm/V, #/m3	tind, sec
	DOI	https://doi.org/10.1016/j.jcrysgro.2010.11.098			310.378	0.01506	300.855	0.00826919	0.00679081	2.80144e+23	9.523	1.82122	0.000277778	87.1557	1.08232e+34	43.5472	0.00332386	7.97603e+18	17.494	1.40569e-09	7.1e-09	0.395969	2.73441e+23	34282.8
					314.362	0.020033	303.915	0.0100243	0.0100087	4.12894e+23	10.447	1.99845		1.44705e-19		43.8425	0.00329039	1.13279e+19	19.3872	1.33529e-09		0.376138	4.26034e+23	37609.2
					320.575	0.029869	306.43	0.0117424	0.0181266	7.47785e+23	14.145	2.54369		J		44.1334	0.00326339	1.50349e+19	23.7932	1.20533e-09		0.339529	7.65605e+23	50922
					325.401	0.039913	307.743	0.0127533	0.0271597	1.12043e+24	17.658	3.12962				44.3159	0.00324946	1.73976e+19	27.2738	1.12579e-09		0.317124	1.10594e+24	63568.8
					329.394	0.049852	308.963	0.0137705	0.0360815	1.48848e+24	20.431	3.6202				44.4541	0.00323663	1.99024e+19	29.6258	1.08018e-09		0.304275	1.46385e+24	73551.6

## Sheet: Pyrazinamide
Supplementary File Model Calculations for estimating nucleation kinetics parameters based on the literature reported.
	Compound	Pyrazinamide
			Units						Avagadro Number	6.023e+23	molecules/mol
	Molecular wt.	123.113	g/mol
	Molecular Formula	C5H5N3O
	Solvent	Acetone
	Density	0.7844	g/mL						Δcmax	Δcmax	ΔTmax	S
					T,K	c*, g/mL	Tnuc, K	cnuc, g/mL	c*-cnuc, g/mL	c*-cnuc, mol/m3	T-Tnuc, K	c*/cnuc	R', K/sec	ΔG, kJ/mol	kn, #/m3sec		1/Tnuc, K	J, #/m3sec	γ,mJ/m2	rc, m	Vcell1/3,m	2rc/Vcell1/3	Nm/V, #/m3	tind, sec
	DOI	https://doi.org/10.1021/acs.iecr.2c01123			298.128	0.00762045	294.446	0.00690416	0.000716281	3.50424e+24	3.6827	1.10375	0.00166667	22.6315	1.69617e+25	48.8154	0.00339621	1.63867e+21	3.30506	1.64803e-09	8.3e-10	3.97115	3.62084e+24	2209.62
					303.323	0.00935397	299.72	0.00844514	0.000908826	4.44622e+24	3.6034	1.10762		3.75752e-20		49.0753	0.00333645	1.92815e+21	3.42299	1.61939e-09		3.90214	4.16874e+24	2162.04
					308.4	0.0113228	305.509	0.0105356	0.000787233	3.85135e+24	2.8907	1.07472		J		49.152	0.00327322	2.29028e+21	2.74634	1.80791e-09		4.35642	3.97232e+24	1734.42
					313.399	0.0136729	311.142	0.013065	0.000607902	2.97402e+24	2.2571	1.04653				49.1409	0.00321396	2.69119e+21	2.04543	2.09491e-09		5.04797	3.64457e+24	1354.26
					298.128	0.00762045	292.703	0.00645961	0.00116084	5.67912e+24	5.425	1.17971	0.00333	21.4268	2.41421e+25	49.603	0.00341643	3.62153e+21	4.55781	1.36551e-09	8.3e-10	3.29039	5.89993e+24	1629.13
					303.323	0.00935397	298.096	0.00793728	0.00141669	6.93084e+24	5.227	1.17849		3.5575e-20		49.8394	0.00335462	4.24686e+21	4.59433	1.36007e-09		3.27729	6.66616e+24	1569.67
					308.4	0.0113228	303.727	0.00984226	0.00148055	7.24324e+24	4.6727	1.15043		J		49.9956	0.00329243	4.9852e+21	4.18504	1.42503e-09		3.43381	6.99529e+24	1403.21
					313.399	0.0136729	309.836	0.0124288	0.00124409	6.08642e+24	3.5639	1.1001				50.0925	0.00322752	5.89291e+21	3.28196	1.6092e-09		3.87758	6.30683e+24	1070.24
